# Supplementary material for: Smilax aspera L. Leaf and Fruit Extracts as Antibacterial Agents for Crop Protection
Source: MDPI journal article supplement (doi:10.3390/agronomy14020383), 2024-02-16
Supplement: s1 [file s1]

# ***Smilax aspera* L. Leaf and Fruit Extracts as Antibacterial Agents for Crop Protection**

**Riccardo Fontana <sup>1</sup>, Eva Sánchez-Hernández <sup>2</sup>, Pablo Martín-Ramos <sup>2,\*</sup>, Jesús Martín-Gil <sup>2</sup>, and Peggy Marconi <sup>1,3</sup>**

<sup>1</sup> Department of Chemical, Pharmaceutical and Agricultural Sciences, University of Ferrara, 44121 Ferrara, Italy; fntcr1@unife.it (R.F.), peggy.marconi@unife.it (P.M.)

<sup>2</sup> Department of Agricultural and Forestry Engineering, ETSIIAA, Universidad de Valladolid, 34004 Palencia, Spain; eva.sanchez.hernandez@uva.es (E.S.-H.), jesus.martin.gil@uva.es (J.M.-G.)

<sup>3</sup> Laboratory for the Technology of Advanced Therapy (LTTA), Technopole of Ferrara, Ferrara 44121, Italy

\* Correspondence: pmr@uva.es (P.M.-R.)

## SUPPLEMENTARY MATERIAL

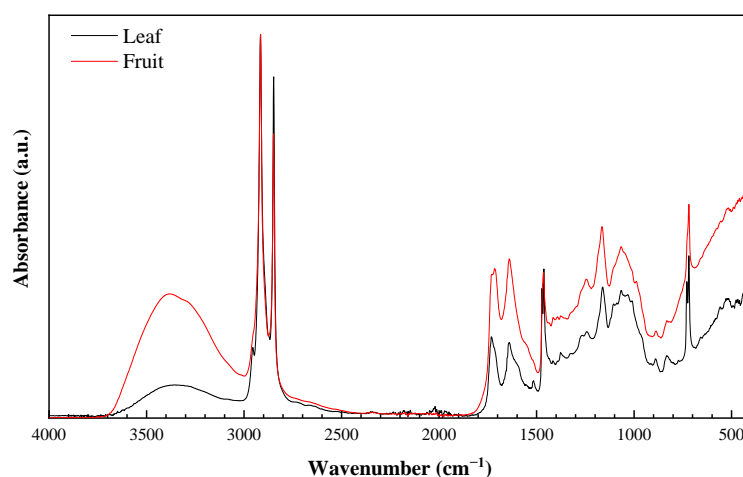

**Figure S1.** ATR-FTIR spectra of *S. aspera* leaves and fruits prior to extraction.

**Table S1.** Phytochemicals identified in *S. aspera* hydromethanolic leaf extract.

| RT<br>(min) | Area<br>(%) | Chemical Species                                                       | Qual |
|-------------|-------------|------------------------------------------------------------------------|------|
| 3.5319      | 1.0699      | Ethylamine                                                             | 35   |
| 3.5794      | 3.4987      | Oxalic acid                                                            | 56   |
| 3.6743      | 24.6513     | Acetic acid                                                            | 91   |
| 3.8702      | 17.4389     | 2-Propanone, 1-hydroxy-                                                | 80   |
| 4.3153      | 1.6072      | Butanenitrile, 2,3-dioxo-, dioxime, O,O'-diacetyl-                     | 40   |
| 4.4044      | 3.4758      | 2,3-Butanediol                                                         | 86   |
| 5.2175      | 2.0965      | Oxime-, methoxy-phenyl-                                                | 80   |
| 5.3006      | 0.8889      | Dihydroxyacetone                                                       | 64   |
| 5.4727      | 1.6072      | 2(5H)-Furanone                                                         | 58   |
| 5.5677      | 0.2709      | 1,4-Butanediol                                                         | 38   |
| 5.6211      | 2.1435      | 2-Cyclopenten-1-one, 2-hydroxy-                                        | 86   |
| 6.1969      | 0.8402      | Phenol                                                                 | 95   |
| 6.3274      | 0.6158      | Diglycerol                                                             | 64   |
| 6.4105      | 5.3028      | 2-Hydroxy- $\gamma$ -butyrolactone                                     | 40   |
| 6.5292      | 1.3268      | Lactic acid, monoanhydride with 1-butaneboronic acid, cyclic ester     | 47   |
| 6.8319      | 1.0994      | Cyclohexanone, 2-methyl-                                               | 59   |
| 6.9922      | 0.3296      | Benzyl alcohol                                                         | 93   |
| 7.0337      | 0.3907      | Acetic acid, 3-ethoxy-4,5-dihydroisoxazol-5-ylmethyl ester             | 25   |
| 7.1524      | 0.5328      | 2-Butanone, 4-hydroxy-3-methyl-                                        | 58   |
| 7.2652      | 0.6265      | 2,5-Dimethyl-4-hydroxy-3(2H)-furanone                                  | 62   |
| 7.7282      | 0.3785      | Mequinol                                                               | 68   |
| 7.9003      | 3.2450      | Cyclopropyl carbinol                                                   | 50   |
| 8.4819      | 0.5094      | 2-Propanamine, N-methyl-N-nitroso-                                     | 42   |
| 8.6303      | 1.6806      | 4H-Pyran-4-one, 2,3-dihydro-3,5-dihydroxy-6-methyl-                    | 93   |
| 8.8559      | 1.1010      | Benzoic acid                                                           | 95   |
| 9.0933      | 0.6587      | 5-Chloro-2,6-dimethyl-4-pyrimidinylamine                               | 64   |
| 9.2773      | 0.4283      | Glycyl-L-valine, N-dimethylaminomethylene-, methyl ester               | 59   |
| 9.4791      | 2.3259      | Catechol                                                               | 95   |
| 9.6987      | 1.2231      | Benzofuran, 2,3-dihydro-                                               | 68   |
| 10.3397     | 0.5499      | 1,2-Benzenediol, 3-methyl-                                             | 94   |
| 10.4821     | 0.2987      | Ethanol, 2-[2-(2-ethoxyethoxy)ethoxy]-                                 | 64   |
| 10.7196     | 0.5246      | 3-Isobutyldihydropyrazin-2-one                                         | 43   |
| 10.7433     | 0.2678      | 3-Cyclopenten-1-one, 2,2,5,5-tetramethyl-                              | 52   |
| 10.9985     | 1.1312      | 2-Methoxy-4-vinylphenol                                                | 90   |
| 11.4733     | 0.2798      | Phenol, 2,6-dimethoxy-                                                 | 93   |
| 11.5624     | 0.3547      | Eugenol                                                                | 95   |
| 12.1381     | 0.1751      | 1-(3,6,6-Trimethyl-1,6,7,7a-tetrahydrocyclopenta[c]pyran-1-yl)ethanone | 93   |
| 12.8266     | 0.6675      | Phenol, 2-methoxy-6-(2-propenyl)-                                      | 42   |
| 13.5091     | 1.0664      | D-Allose                                                               | 49   |
| 14.1917     | 0.2424      | 1,3-Benzenedicarboxylic acid, 5-methyl-                                | 43   |
| 14.2273     | 0.4045      | 1-Adamantyl methyl ketone                                              | 50   |
| 14.5003     | 4.1825      | $\alpha$ -D-Galactopyranoside, methyl                                  | 86   |
| 14.6072     | 1.0582      | $\beta$ -D-Glucopyranoside, methyl                                     | 47   |
| 15.0464     | 4.5408      | D-Fucose                                                               | 43   |
| 15.6696     | 0.3619      | Cyclopentanol, 2-cyclopentylidene-                                     | 86   |
| 15.7883     | 0.3153      | Phenol, 2,6-dimethoxy-4-(2-propenyl)-                                  | 60   |

**Table S2.** Phytochemicals identified in *S. aspera* hydromethanolic fruit extract.

| RT (min) | Area (%) | Chemical Species                                          | Qual |
|----------|----------|-----------------------------------------------------------|------|
| 3.2472   | 31.5657  | Acetic acid                                               | 91   |
| 3.4431   | 4.7791   | 2-Propanone, 1-hydroxy-                                   | 64   |
| 3.4965   | 0.1856   | Methyl formate                                            | 43   |
| 3.5796   | 0.7025   | Acetic acid, hydroxy-, methyl ester                       | 90   |
| 4.0841   | 2.8061   | 2,3-Butanediol, [R-(R*,R*)]-                              | 86   |
| 4.1553   | 0.4638   | 2,3-Butanediol                                            | 43   |
| 4.3215   | 0.6991   | 3-Butenoic acid                                           | 89   |
| 4.4699   | 3.6702   | 2-Furanmethanol                                           | 98   |
| 4.9566   | 2.2513   | Diisopropyl ether                                         | 72   |
| 5.1880   | 0.9433   | Dihydroxyacetone                                          | 72   |
| 5.3008   | 0.2839   | 4-Trifluoroacetoxyoctane                                  | 38   |
| 5.3720   | 1.3955   | 2(5H)-Furanone                                            | 86   |
| 5.4017   | 1.2199   | Butyrolactone                                             | 87   |
| 5.4848   | 1.5040   | 2-Cyclohexen-1-ol                                         | 52   |
| 5.5560   | 4.1335   | 2-Cyclopenten-1-one, 2-hydroxy-                           | 87   |
| 6.1199   | 0.5389   | Sulfurous acid, isohexyl 2-propyl ester                   | 27   |
| 6.3336   | 0.2586   | Furan, 2,3-dihydro-4-methyl-                              | 80   |
| 6.4701   | 2.2381   | 2-Hydroxy- $\gamma$ -butyrolactone                        | 38   |
| 6.8915   | 1.6307   | Proline, 3,4-didehydro-                                   | 47   |
| 7.1348   | 0.3394   | $\beta$ -D-Ribopyranoside, methyl, 3-acetate              | 25   |
| 7.1823   | 0.2985   | 1H-Azepin-1-amine, hexahydro-                             | 55   |
| 7.3723   | 0.2597   | 3-Isothiazolecarboxamide                                  | 50   |
| 7.4316   | 0.3136   | 2-Propenamide                                             | 50   |
| 7.7343   | 0.4553   | 3-Methoxycarbonylpyrazole                                 | 72   |
| 7.9658   | 10.5218  | 2(3H)-Furanone, dihydro-4-hydroxy-                        | 56   |
| 8.1616   | 0.4471   | Maltol                                                    | 64   |
| 8.5000   | 0.2560   | 2-Propanamine, N-methyl-N-nitroso-                        | 52   |
| 8.6721   | 0.3626   | 4H-Pyran-4-one, 2,3-dihydro-3,5-dihydroxy-6-methyl-       | 87   |
| 8.8323   | 0.3540   | Benzoic acid                                              | 96   |
| 8.9451   | 3.0371   | 1,3-Dioxolane-4-methanol                                  | 64   |
| 9.4496   | 5.9550   | Catechol                                                  | 96   |
| 9.6929   | 0.5009   | Benzofuran, 2,3-dihydro-                                  | 46   |
| 9.7345   | 0.2409   | Ethanol, 2-phenoxy-                                       | 38   |
| 10.3102  | 0.7109   | 1,2-Benzenediol, 3-methyl-                                | 86   |
| 10.5417  | 0.2461   | Resorcinol, 2-acetyl-                                     | 81   |
| 10.7672  | 1.6456   | L-Alanine, N-(2-furoyl)-, propyl ester                    | 45   |
| 11.0047  | 0.4798   | 2-Methoxy-4-vinylphenol                                   | 64   |
| 11.1887  | 0.2130   | Sulfurous acid, di(2-methyl-4-methoxybutyl) ester         | 38   |
| 14.1326  | 0.1377   | 1,2,4-Triazin-5(2H)-one, 3,4-dihydro-3-thioxo-            | 20   |
| 14.2394  | 0.4073   | 3,4-methylenedioxyphenyl-1-propanal                       | 52   |
| 15.1178  | 1.9184   | D-Fucose                                                  | 27   |
| 15.6401  | 0.5657   | Hexanoic acid, 9-decen-1-yl ester                         | 22   |
| 16.0318  | 0.2590   | Methyl tetradecanoate                                     | 95   |
| 17.1121  | 0.1443   | Methyl 9-methyltetradecanoate                             | 78   |
| 17.9134  | 0.3401   | 13-Borabicyclo[7.3.0]tridecane, 13-propoxy-, (Z)- or (E)- | 25   |
| 18.1448  | 1.9822   | Hexadecanoic acid, methyl ester                           | 99   |
| 18.5425  | 0.4606   | 2H-1-Benzopyran, 6,7-dimethoxy-2,2-dimethyl-              | 64   |
| 19.7770  | 0.7825   | 9,12-Octadecadienoic acid, methyl ester                   | 99   |
| 19.8364  | 2.7956   | 11-Octadecenoic acid, methyl ester                        | 99   |
| 20.0679  | 0.2995   | Heptadecanoic acid, 16-methyl-, methyl ester              | 98   |
